# Supplementary material for: Mapping the sodium intercalation mechanism, electrochemical properties and structural evolution in non-stoichiometric alluaudite Na2+2δFe2−δ(SO4)3 cathode materials
Source: Royal Society of Chemistry journal article supplement (doi:10.1039/c9ta03930a), 2019-01-01
Supplement: c9ta03930a1.pdf [file c9ta03930a1.pdf]

## Supporting information for

# “Mapping Sodium Intercalation Mechanism, Electrochemical Properties and Structural Evolution in Non-stoichiometric Alluaudite $\text{Na}_{2+2\delta}\text{Fe}_{2-\delta}(\text{SO}_4)_3$ Cathode Materials”

Teeraphat Watcharatharapong\*<sup>a</sup>, Sudip Chakraborty\*<sup>a,b</sup>, and Rajeev Ahuja<sup>a,c</sup>

<sup>a</sup> Condensed Matter Theory Group, Materials Theory Division, Department of Physics and Astronomy, Uppsala University, Box 530, SE-75121, Uppsala, Sweden.

<sup>b</sup> Discipline of Physics, Indian Institute of Technology (IIT) Indore, Indore, Madhya Pradesh, 453552, India

<sup>c</sup> Department of Materials Science and Engineering, Royal Institute of Technology, SE-10044 Stockholm, Sweden.

## Figures and Tables

**Table S1** Fractional atomic coordinates and occupancies for the fully-desodiated  $\text{Fe}_2(\text{SO}_4)_3$  structure with  $C2/c$  symmetry in which  $a = 17.27 \text{ \AA}$ ,  $b = 6.41 \text{ \AA}$ ,  $c = 9.57 \text{ \AA}$ , and  $\beta = 119.08^\circ$

| Site | Wyckoff | $x$    | $y$    | $z$    | Occu. |
|------|---------|--------|--------|--------|-------|
| Fe1  | $8f$    | 0.1387 | 0.1313 | 0.1199 | 1.0   |
| S1   | $4e$    | 0.0000 | 0.0017 | 0.2500 | 1.0   |
| S2   | $8f$    | 0.3114 | 0.1297 | 0.3230 | 1.0   |
| O11  | $8f$    | 0.0467 | 0.1384 | 0.1911 | 1.0   |
| O12  | $8f$    | 0.4367 | 0.3631 | 0.1188 | 1.0   |
| O21  | $8f$    | 0.3689 | 0.3152 | 0.3905 | 1.0   |
| O22  | $8f$    | 0.2355 | 0.1295 | 0.3580 | 1.0   |
| O23  | $8f$    | 0.2634 | 0.1289 | 0.1423 | 1.0   |
| O24  | $8f$    | 0.1299 | 0.4451 | 0.1076 | 1.0   |

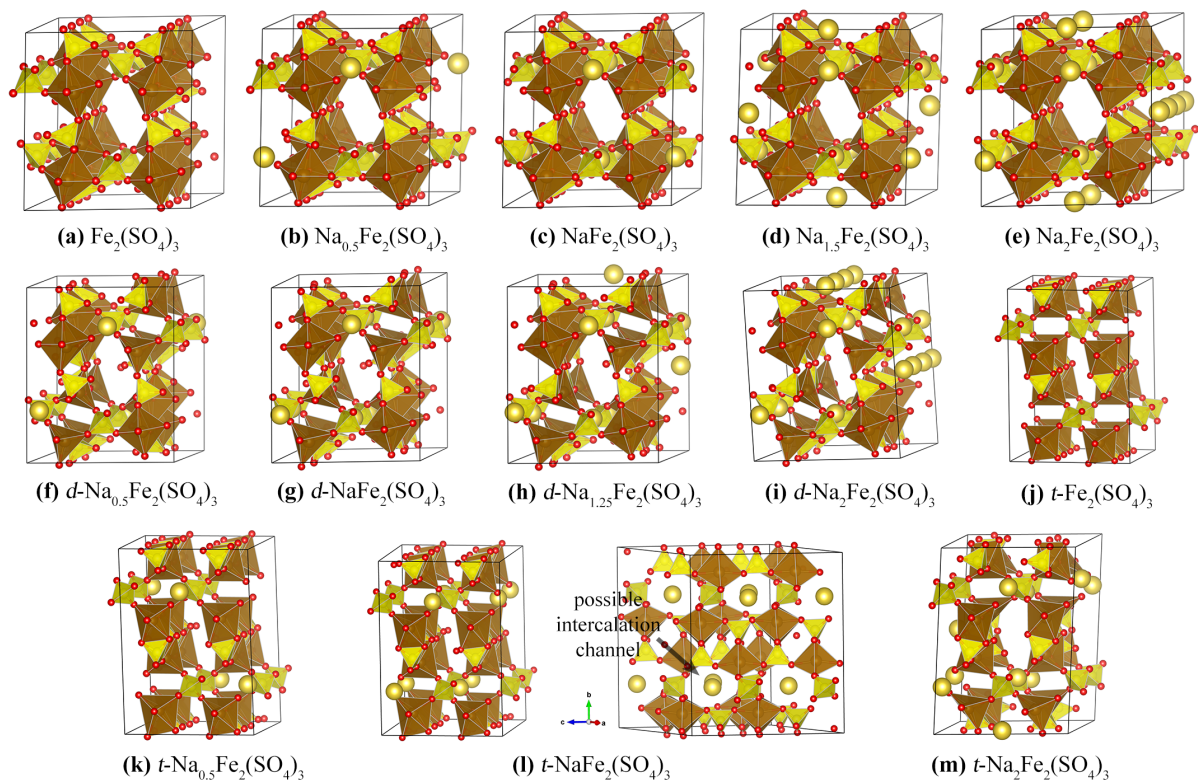

**Figure S1** Minimum energy configurations of  $\text{Na}_x\text{Fe}_2(\text{SO}_4)_3$  illustrated in (a-e) pristine, (f-i) *d*-phase and (j-m) *t*-phase.

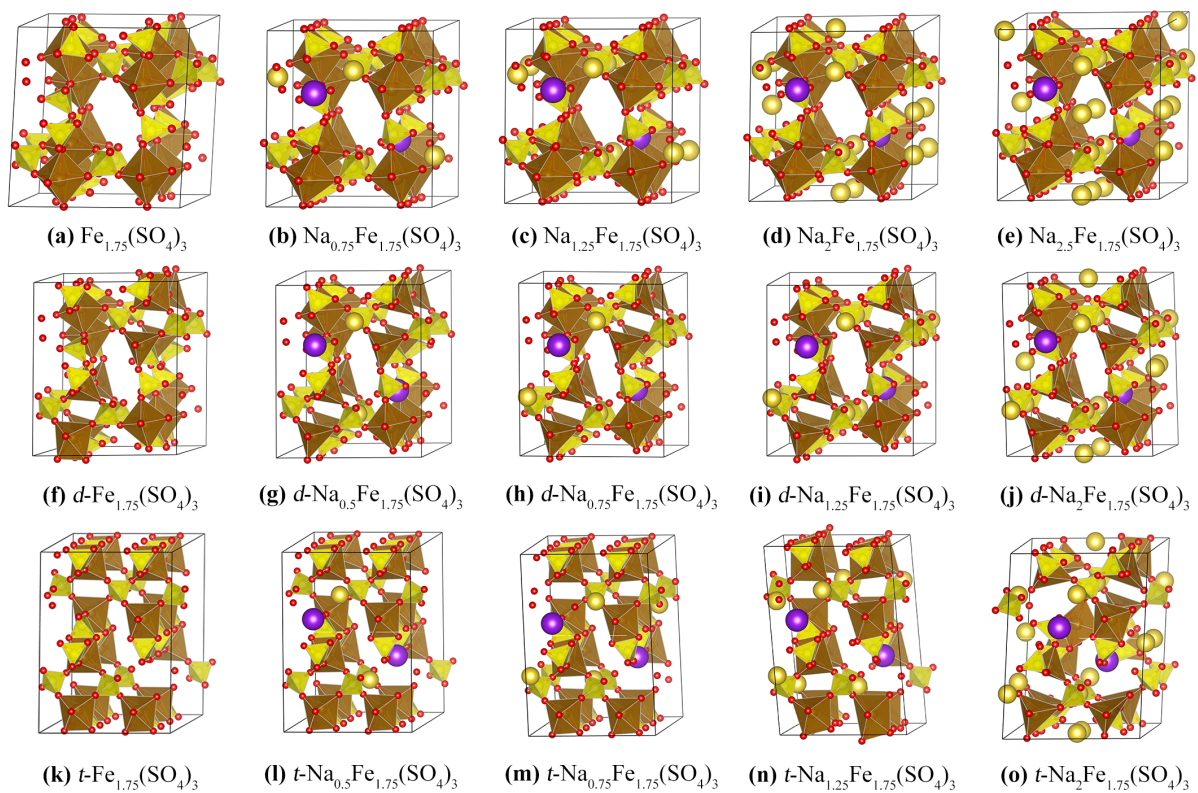

**Figure S2** Minimum energy configurations of  $\text{Na}_x\text{Fe}_{1.75}(\text{SO}_4)_3$  illustrated in (a-e) pristine, (f-j) *d*-phase and (k-o) *t*-phase.

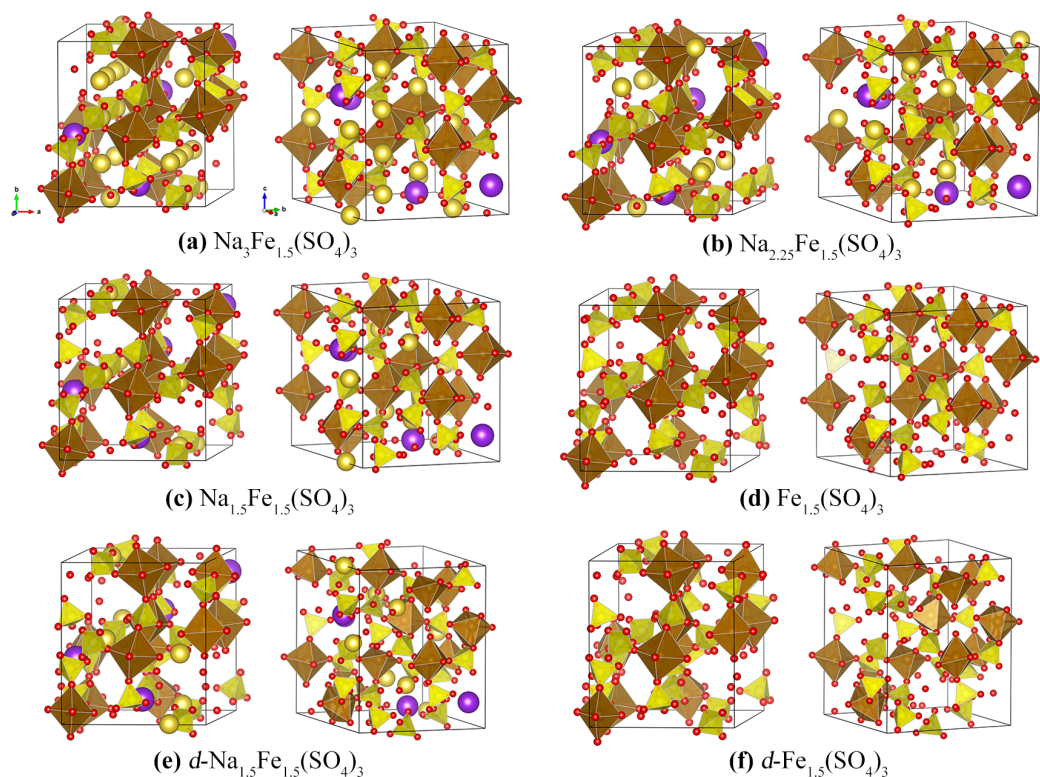

**Figure S3** Minimum energy configurations of  $\text{Na}_x\text{Fe}_{1.5}(\text{SO}_4)_3$  illustrated in (a-d) pristine and (e-f) *d*-phase.

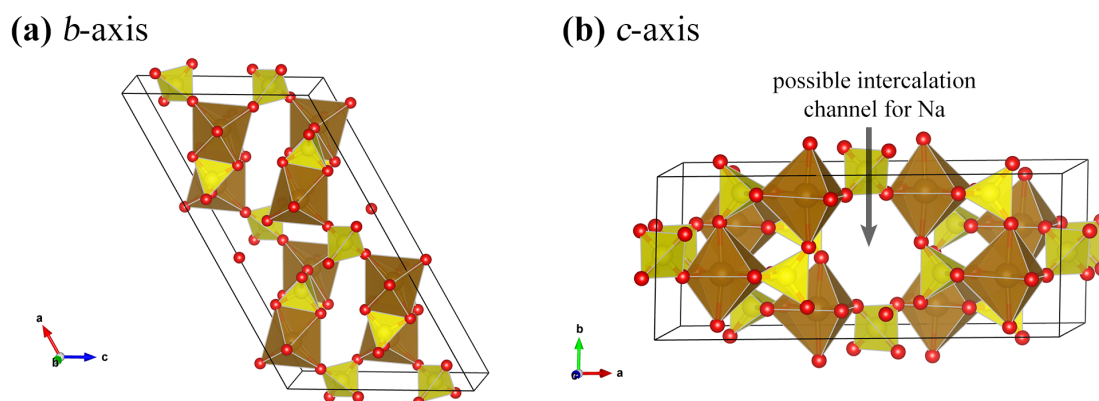

**Figure S4** The primitive crystal structure of  $\text{Fe}_2(\text{SO}_4)_3$  in  $C2/c$  space group (*t*-phase) illustrated along (a) *b*-direction and (b) *c*-direction. Possible intercalation channel for  $\text{Na}^+$  ion in *t*-phase is emerged as shown in (b).

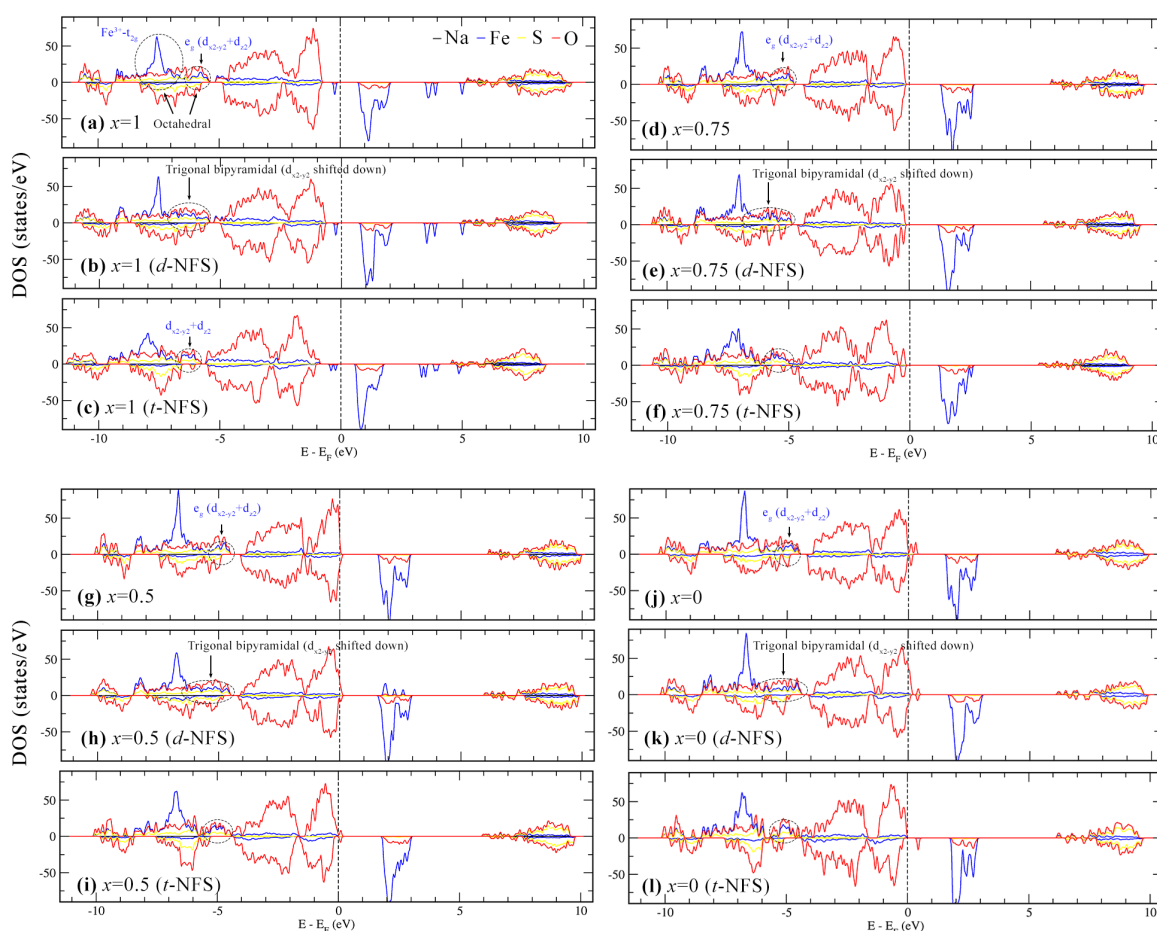

**Figure S5** Density of states of desodiated  $\text{Na}_x\text{Fe}_{1.75}(\text{SO}_4)_3$  cathodes with (a-c)  $x = 1$ , (d-f)  $x = 0.75$ , (g-i)  $x = 0.5$  and (j-l)  $x = 0$  in three different phases; the original,  $d$ - and  $t$ -phases, respectively. The Fermi levels are set to zero and are represented by the dashed lines. Dashed-circles indicate the change in electronic state for each phase due to the different crystal field splitting around Fe, where the doubly degenerate state ( $e_g$  orbital;  $d_{x^2-y^2}$  and  $d_{z^2}$ ) is appeared due to  $\text{FeO}_6$  octahedral field in the original and  $t$ -phase, and the lowering  $d_{x^2-y^2}$  orbital is preset due to  $\text{FeO}_5$  trigonal bipyramidal field in  $d$ -phase.
